# Supplementary material for: Enzyme mimics based on self-assembled peptides for di(2-ethylhexyl)phthalate degradation
Source: Royal Society of Chemistry journal article supplement (doi:10.1039/d0tb01931c), 2020-01-01
Supplement: d0tb01931c1.pdf [file d0tb01931c1.pdf]

**Electronic Supplementary Material (ESI) for Journal of Materials Chemistry B**

**Enzyme Mimics Based on Self-Assembled Peptides for Di(2-ethylhexyl) Phthalate Degradation**

*Xia Li,<sup>a</sup> Jianpeng Li,<sup>b</sup> Sijia Hao,<sup>a</sup> Ailing Han,<sup>a</sup> Yayu Yang,<sup>a</sup> Xiaoyu Luo,<sup>a</sup> Guozhen*

*Fang,<sup>a</sup> Jifeng Liu,<sup>\*a</sup> Shuo Wang<sup>\*a,c</sup>*

<sup>a</sup>: State Key Laboratory of Food Nutrition and Safety, Tianjin University of Science and Technology, Tianjin 300457, PR China. Jifeng Liu, Email: [liujifeng111@gmail.com](mailto:liujifeng111@gmail.com), Shuo Wang, Email: [s.wang@tust.edu.cn](mailto:s.wang@tust.edu.cn).

<sup>b</sup>: School of Food Science and Engineering, Qilu University of Technology (Shandong Academy of Sciences), Ji'nan, Shandong 250353, PR China.

<sup>c</sup>: Research Center of Food Science and Human Health, School of Medicine, Nankai University, Tianjin 300071, PR China

Table S1 Amino acid sequences and isoelectric points of the peptide-based enzyme mimics

| Peptides | Amino acid sequences         | Isoelectric points |
|----------|------------------------------|--------------------|
| P1       | Ac-KYFDHSG-NH <sub>2</sub>   | 8.02               |
| P2       | Ac-SFDFHIG-NH <sub>2</sub>   | 4.87               |
| P3       | Ac-FGISDFHI-NH <sub>2</sub>  | 4.87               |
| P4       | Ac-FHISDFGI-NH <sub>2</sub>  | 4.87               |
| P5       | Ac-FGISFEFHI-NH <sub>2</sub> | 5.1                |
| P6       | Ac-IGISIDIHI-NH <sub>2</sub> | 4.87               |

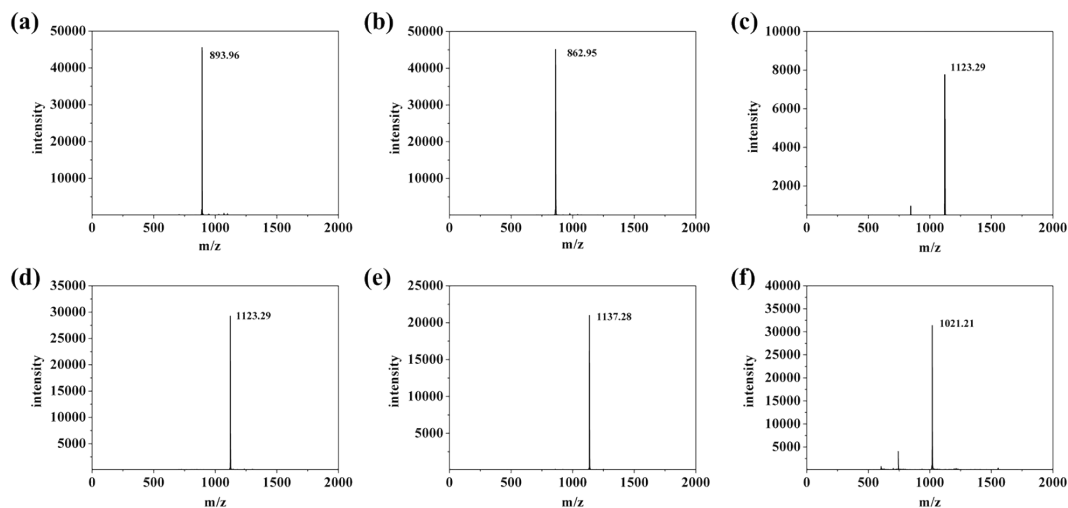

Fig. S1. MALDI-TOF-MS of the six peptides. The MS from (a) to (f) were represented from P1 to P6.

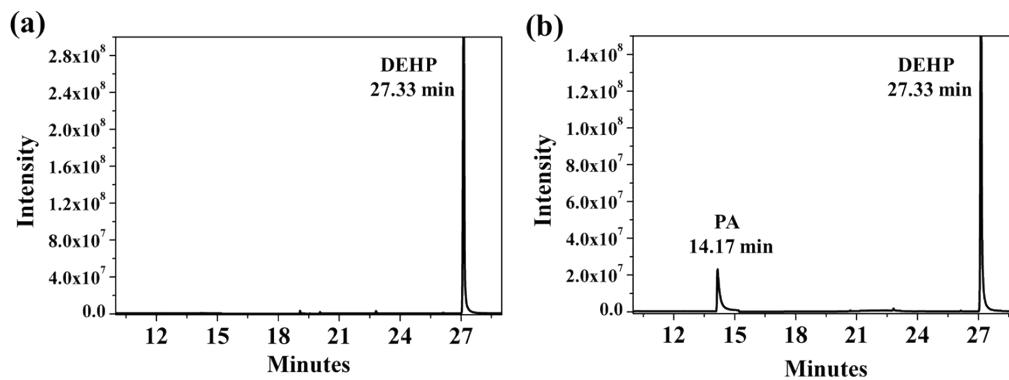

Fig. S2 GC-MS chromatograms of DEHP and its degradation intermediates. (a) Control, (b) DEHP degradation intermediates by P3

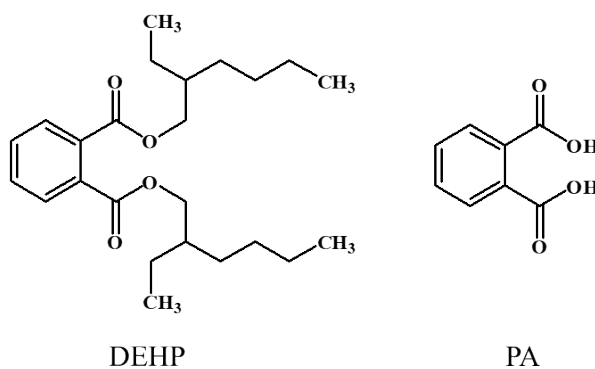

Fig. S3. Structure of DEHP and its degradation intermediates.

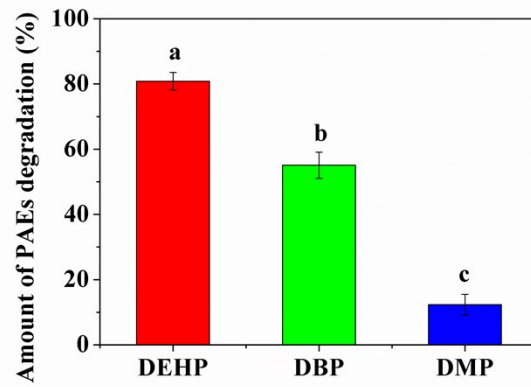

Fig. S4. The DEHP, DBP and DMP degradation by P3 at pH 8.0 and 50 °C for 48 h. Values with different letters indicate significant differences ( $p < 0.05$ ).

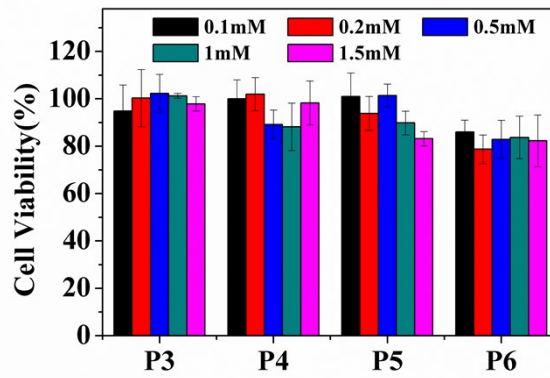

Fig. S5 HeLa cell viability assay with different concentrations of self-assembled peptides for 24h.
